# Supplementary material
Source: publisher figshare collection journal article supplement (https://tandf.figshare.com/articles/dataset/_/4781071)
Supplement: Supplementary file 1 [file 1]

Archive with 2 entries (2 files):
- ijas_a_1299757_sm8324.docx
- ijas_a_1299757_sm7835.pdf
