# Supplementary material
Source: publisher figshare collection journal article supplement (https://tandf.figshare.com/articles/dataset/_/4781071)
Supplement: Supplementary file 1 [file 1 › ijas_a_1299757_sm8324.docx]

**Table 1.** Individual responses to each question, and all missing data

| **Question** | **Answer** | **Total Responses** | **Missing Data**  **N (%)** |
| --- | --- | --- | --- |
| **Asthma Control Test** |  |  |  |
| In the past 4 weeks, how much time did your asthma keep you from getting as much done at work, school or home? |  | **766** | **0** |
|  | All the time | 6 |  |
|  | Most of the time | 57 |  |
|  | Some of the time | 144 |  |
|  | A little of the time | 235 |  |
|  | None of the time | 324 |  |
|  |  |  |  |
| In the past 4 weeks, how often have you had shortness of breath? |  | **766** | **0** |
|  | More than once a day | 60 |  |
|  | Once a day | 73 |  |
|  | 3 to 6 times a day | 80 |  |
|  | Once or twice a week | 367 |  |
|  | Not at all | 186 |  |
|  |  |  |  |
| In the past 4 weeks, how often did your asthma symptoms wake you up at night or earlier than usual in the morning? |  | **766** | **0** |
|  | 4 or more nights a week | 31 |  |
|  | 2 to 3 nights a week | 90 |  |
|  | Once a week | 73 |  |
|  | Once or twice | 239 |  |
|  | Not at all | 333 |  |
|  |  |  |  |
| In the past 4 weeks, how often have you used your reliever inhaler (usually blue)? |  | **766** | **0** |
|  | 3 or more times per day | 54 |  |
|  | 1 to 2 times per day | 100 |  |
|  | 2 to 3 times per week | 142 |  |
|  | Once a week or less | 242 |  |
|  | Not at all | 228 |  |
|  |  |  |  |
| How would you rate your asthma control during the past 4 weeks? |  | **766** | **0** |
|  | Not controlled at all | 13 |  |
|  | Poorly controlled | 47 |  |
|  | Somewhat controlled | 168 |  |
|  | Well controlled | 330 |  |
|  | Completely controlled | 208 |  |
|  |  |  |  |
| If you had completely controlled asthma in the last 4 weeks: Would you say your asthma has gone away? |  | **201** | **7 (3.4)** |
|  | Yes | 112 |  |
|  | No | 89 |  |
| **Adherence** |  |  |  |
| What type of inhaler(s) do you use on a regular basis? Only mention medication you use on a daily or weekly basis |  | **766** | **0** |
|  |  |  |  |
| Do you use a spacer with any of your inhalers? |  | **762** | **4 (0.5)** |
|  | Yes, I use a spacer with all of my inhalers | 166 |  |
|  | Yes, I use a spacer with some of my inhalers | 145 |  |
|  | No, I do not use a spacer with any of my inhalers | 451 |  |
|  |  |  |  |
| If you are using a spacer: How often do you use your spacer?* |  | **327** |  |
|  | All of the time | 82 |  |
|  | Most of the time | 46 |  |
|  | Some of the time | 63 |  |
|  | A little of the time | 97 |  |
|  | None of the time | 39 |  |
|  |  |  |  |
|  |  |  |  |
| If you are using a spacer: What do you think your spacer is for?* |  | **314** |  |
|  |  |  |  |
| Do you feel comfortable when you use your inhaler at school? |  | **762** | **4 (0.5)** |
|  | Not at all comfortable | 31 |  |
|  | Hardly comfortable | 70 |  |
|  | Somewhat comfortable | 145 |  |
|  | Very comfortable | 120 |  |
|  | Completely comfortable | 226 |  |
|  | I do not need to use it in school | 170 |  |
|  |  |  |  |
| Do you feel comfortable when you use your inhaler outside school (e.g. at home)? |  | **762** | **4 (0.5)** |
|  | Not at all comfortable | 14 |  |
|  | Hardly comfortable | 25 |  |
|  | Somewhat comfortable | 98 |  |
|  | Very comfortable | 167 |  |
|  | Completely comfortable | 458 |  |
|  |  |  |  |
| If you are taking regular inhaler (e.g. brown inhaler): Do you sometimes forget to take your regular preventer inhaler?* |  | **752** |  |
|  | All of the time | 61 |  |
|  | Most of the time | 91 |  |
|  | Some of the time | 150 |  |
|  | A little of the time | 150 |  |
|  | None of the time | 106 |  |
|  | I do not have a regular inhaler | 194 |  |
|  |  |  |  |
| If you are taking a regular preventer medication (e.g. brown inhaler): Do you sometimes miss your regular preventer inhaler on purpose?* |  | **551** |  |
|  | All of the time | 24 |  |
|  | Most of the time | 28 |  |
|  | Some of the time | 71 |  |
|  | A little of the time | 99 |  |
|  | None of the time | 329 |  |
|  |  |  |  |
| Would you like to tell us why? | Free text response | **208** | **264 (55.9)** |
|  |  |  |  |
| If you are taking a regular preventer inhaler (e.g. brown inhaler): What is your regular preventer for?* |  | **523** |  |
|  |  |  |  |
| Do you sometimes not use your blue reliever when you would need it?* |  | **720** |  |
|  | All of the time | 34 |  |
|  | Most of the time | 46 |  |
|  | Some of the time | 116 |  |
|  | A little of the time | 182 |  |
|  | None of the time | 342 |  |
|  |  |  |  |
| Would you like to tell us why? |  |  |  |
|  | Free text response | **260** | **388 (59.9)** |
|  |  |  |  |
| **Medical Attention** |  |  |  |
| How many times have you had an unplanned visit to your GP/doctor due to your asthma in the last month? |  | **743** | **23 (3)** |
|  | 4 or more times | 15 |  |
|  | 2-3 times | 34 |  |
|  | 1-2 times | 160 |  |
|  | Not at all | 534 |  |
|  |  |  |  |
| How many times have you had an unplanned visit to the hospital due to your asthma in the last month? |  | **743** | **23 (3)** |
|  | 4 or more times | 9 |  |
|  | 2-3 times | 20 |  |
|  | 1-2 times | 88 |  |
|  | Not at all | 626 |  |
| **School Activity** |  |  |  |
| How many times have you missed a whole day of school due to your asthma in the last month? |  | **738** | **28 (3.7)** |
|  | 4 or more times | 16 |  |
|  | 2-3 times | 18 |  |
|  | 1-2 times | 120 |  |
|  | Not at all | 584 |  |
|  |  |  |  |
| How many times have you missed part of a day of school due to your asthma in the last month? |  | **738** | **28 (3.7)** |
|  | 4 or more times | 8 |  |
|  | 2-3 times | 15 |  |
|  | 1-2 times | 107 |  |
|  | Not at all | 608 |  |
|  |  |  |  |
| How many times have you missed all or part of a regular class lesson due to your asthma in the last month? |  | **738** | **28 (3.7)** |
|  | 4 or more times | 6 |  |
|  | 2-3 times | 17 |  |
|  | 1-2 times | 121 |  |
|  | Not at all | 594 |  |
|  |  |  |  |
| How many times have you missed all or part of a P.E. lesson due to your asthma in the last month? |  | **738** | **28 (3.7)** |
|  | 4 or more times | 16 |  |
|  | 2-3 times | 29 |  |
|  | 1-2 times | 166 |  |
|  | Not at all | 527 |  |
|  |  |  |  |
| Do you feel that your asthma has a negative impact on how well you do in any of your classes or exams? |  | **740** | **26 (3.4)** |
|  | My asthma doesn’t have an impact at all | 323 |  |
|  | My asthma hardly has an impact | 176 |  |
|  | My asthma has a little bit of an impact | 119 |  |
|  | My asthma has some impact | 98 |  |
|  | My asthma has a big impact | 24 |  |
| **Lifestyle and Smoking** |  |  |  |
| Do you smoke? |  | **733** | **33 (4.3)** |
|  | Yes, everyday | 8 |  |
|  | Yes, 5-6 days a week | 4 |  |
|  | Yes, 3-4 days a week | 5 |  |
|  | Yes, 1-2 days a week | 4 |  |
|  | Yes, less than once a week | 18 |  |
|  | No, not at all | 694 |  |
|  |  |  |  |
| Do your parents/carers or other people you live with smoke at the moment? |  | **734** | **32 (4.2)** |
|  | Yes | 185 |  |
|  | No | 549 |  |

*The paper version of the questionnaire allowed some participants to answer questions that were not directly relevant to them (e.g. some students answered questions regarding the use of a spacer, despite reporting not having a spacer)

**Table 2.** Details of participating London schools

| **Type of School*** | **Total students**  **N** | **Method of recording asthmatics**† | **Reported asthmatics**  **N (%)** | **Asthmatic Participants**‡  **N (%)** | **Suboptimal control**  **(%)** | **Median ACT Score**  **(Units)** |
| --- | --- | --- | --- | --- | --- | --- |
| C | 1236 | TR | 55 (4.4) | 7 | 71.4 | 18 |
| C | 1211 | I | N/A | 51 | 52.9 | 19 |
| C | 1411 | TR | 40 (2.8) | 20 | 40 | 20.5 |
| C | 1023 | TR | 68 (6.6) | 62 | 54.8 | 19 |
| C | 2000 | TR | 20 (1) | 13 | 69.2 | 19 |
| C | 2576 | TR | 24 (0.9) | 7 | 42.9 | 22 |
| C | 967 | TR | 46 (4.8) | 18 | 61.1 | 18 |
| I | 1345 | I | N/A | 16 | 18.8 | 21 |
| G | 898 | TR | 150 (16.7) | 72 | 43.1 | 20 |
| C | 1145 | TR | 78 (6.8) | 42 | 42.9 | 21.5 |
| C | 1518 | TR | 60 (4.0) | 15 | 33.3 | 21 |
| C | 1104 | TR | 40 (3.6) | 8 | 62.5 | 18.5 |
| G | 888 | TR | 59 (6.6) | 34 | 44.1 | 20 |
| C | 1256 | TR | 12 (1.0) | 8 | 62.5 | 16.5 |
| C | 1361 | TR | 40 (2.9) | 23 | 47.8 | 20 |
| C | 1972 | TR | 61 (3.1) | 47 | 48.9 | 20 |
| C | 1659 | TR | 102 (6.1) | 37 | 51.4 | 19 |
| G | 1185 | TR | 99 (8.4) | 53 | 45.3 | 20 |
| C | 1130 | TR | 50 (4.4) | 23 | 65.2 | 18 |
| C | 1341 | I | N/A | 4 | 50 | 19.5 |
| C | 704 | TR | 33 (4.7) | 34 | 50 | 19.5 |
| C | 1974 | TR | 90 (4.6) | 57 | 68.4 | 17 |
| C | 951 | TR | 70 (7.4) | 7 | 28.6 | 22 |
| C | 898 | TR | 81 (9.0) | 31 | 35.5 | 21 |

* All secondary schools with students between 11 and 18 years of age; ACT; Asthma Control test, C; Comprehensive; I; Independent; G; Grammar

† TR = teacher reported; I = informal

‡ students who completed all ACT questions. N/A; not applicable.

**Table 3.** Details of non-participating London schools who expressed an interest

| **School Reference** | **Type of School*** | **Total students**  **N** | **Gender** |
| --- | --- | --- | --- |
| 1 | Selective Sixth Form | 440 | Co-Educational |
| 2 | Comprehensive | 1437 | Girls |
| 3 | Comprehensive | 550 | Co-Educational |
| 4 | Comprehensive | 1257 | Co-Educational |
| 5 | Independent | 266 | Girls |
| 6 | Comprehensive | 1470 | Co-Educational |
| 7 | Comprehensive | 1079 | Girls |
| 8 | Comprehensive | 850 | Boys |
| 9 | Comprehensive | 1163 | Co-Educational |
| 10 | Comprehensive | 573 | Co-Educational |
| 11 | Comprehensive | 819 | Co-Educational |
| 12 | Independent | 707 | Girls |
| 13 | Comprehensive | 1288 | Co-Educational |
| 14 | Comprehensive | 160 | Girls |
| 15 | Independent | 157 | Boys |
| 16 | Independent | 800 | Boys |
| 17 | Independent | 750 | Co-Educational |
| 18 | Comprehensive | 1250 | Girls |
| 19 | Comprehensive | 1600 | Co-Educational |

*Selective sixth form = entry examination required; Comprehensive = intake of students not selected using an entry examination; Independent = not dependent on national or local government for finances and governance
